# Supplementary material for: A gut microbial metabolite of dietary polyphenols reverses obesity-driven hepatic steatosis
Source: PubMed Central journal article supplement — Proc Natl Acad Sci U S A. 2022 Nov 23;119(48):e2202934119. doi: 10.1073/pnas.2202934119 (PMC9860326; doi:10.1073/pnas.2202934119), 2022-11-23
Supplement: pnas.2202934119.sapp.pdf [file pnas.2202934119.sapp.pdf]

1 **Supplementary Materials for:**

2 A gut microbial metabolite of dietary polyphenols reverses obesity-driven hepatic  
3 steatosis

4

5 Authors: Lucas J. Osborn, Karlee Schultz, William Massey, Beckey DeLucia, Ibrahim  
6 Choucair, Venkateshwari Varadharajan, Rakhee Banerjee, Kevin Fung, Anthony J.  
7 Horak III, Danny Orabi, Ina Nemet, Laura E. Nagy, Zeneng Wang, Daniela S. Allende,  
8 Belinda B. Willard, Naseer Sangwan, Adeline M. Hajjar, Christine McDonald, Philip P.  
9 Ahern, Stanley L. Hazen, J. Mark Brown, Jan Claesen

10

11 Correspondence to: [brownm5@ccf.org](mailto:brownm5@ccf.org) and [claesej@ccf.org](mailto:claesej@ccf.org)

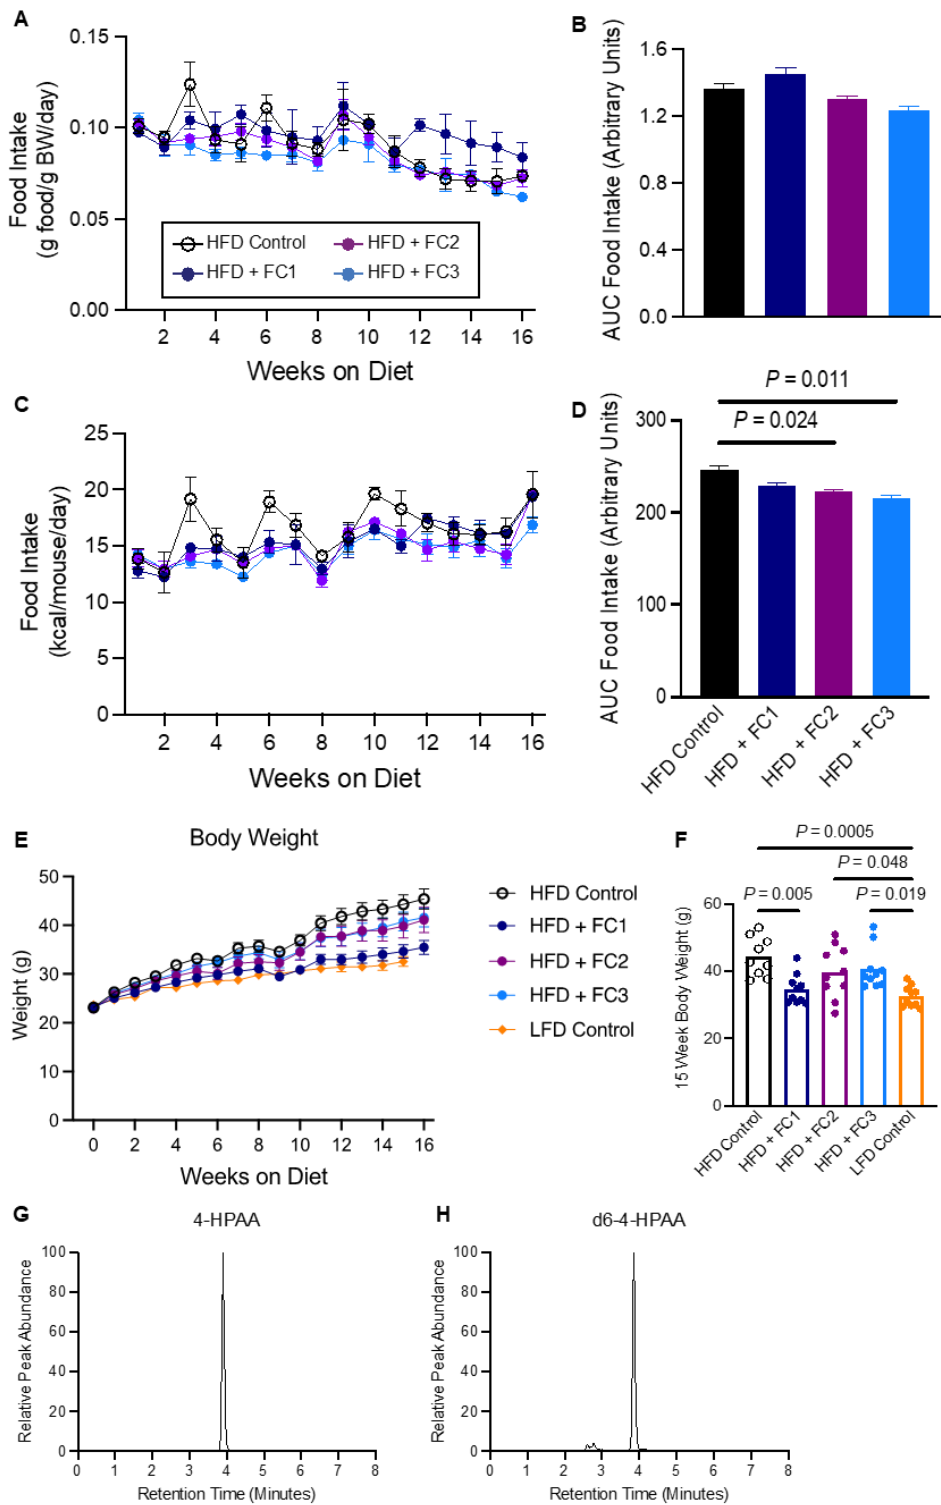

12

13

**Fig. S1. Flavonoid composites do not impact food consumption but modulate the**

14

**gut microbial community structure. (A) Weekly food consumption data represented**

15 as grams of food consumed per gram of body weight per day. **(B)** Mean cumulative  
16 AUC for food intake as represented in panel A; ordinary one-way ANOVA with Dunnett's  
17 multiple comparisons test with error bars representing SEM. n=9-10 per group. **(C)**  
18 Weekly food consumption data represented as kcal consumed per gram of body weight  
19 per day. **(D)** Mean cumulative AUC for food intake as represented in panel C; one-way  
20 ANOVA with Tukey's multiple comparisons test with error bars representing SEM. n=9-  
21 10 per group. **(E)** Body weights of age and sex matched data from mice eating a low fat  
22 diet (LFD) for 15 weeks compared to the experimental groups in Fig. 1A. **(F)** 15-week  
23 body weights for LFD, HFD and HFD + FC mice. N=9-10 per group, one-way ANOVA  
24 with Tukey's multiple comparisons test. Only *P* values <0.05 are shown. **(G)** and **(H)**  
25 Chromatograms representing the relative peak abundance of 4-HPAA and d6-4-HPAA  
26 at 50  $\mu$ M as measured by LC-MS/MS. Individual points represent individual mice, and  
27 bars represent group means.

28

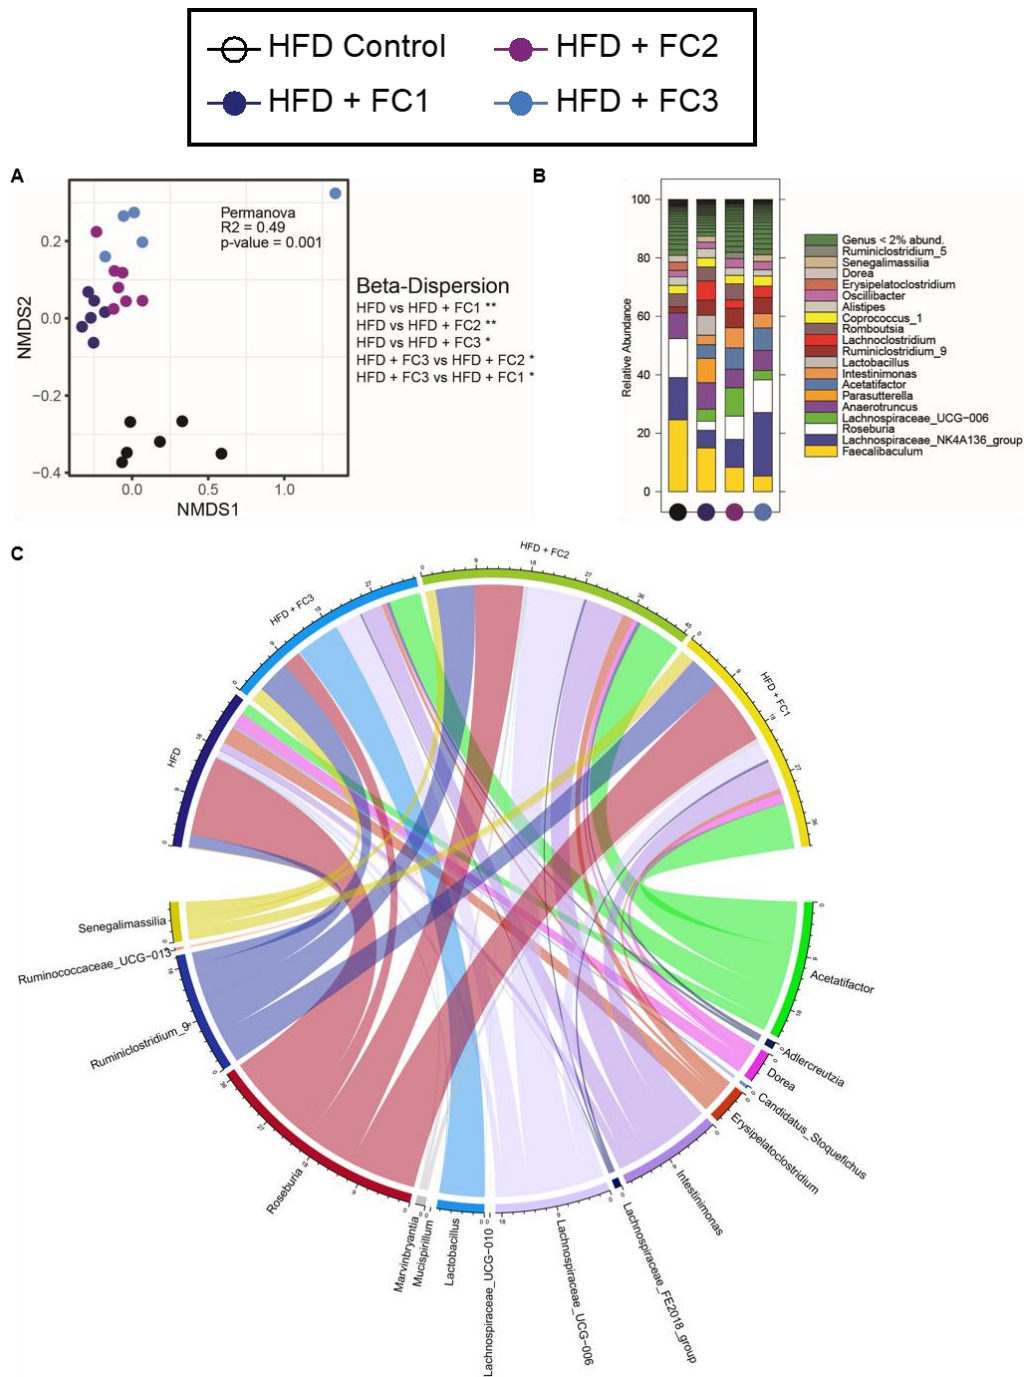

29

30

31

32

33

**Fig. S2. Feeding different flavonoid composites shifts the cecal microbiota composition in a distinguishable manner. (A)** NMDS plots based on the Bray-Curtis index between the cecal 16S rRNA profile of all four groups. Statistical analysis was performed with PERMANOVA where R2 values are noted for comparisons with

34 significant p-values and stand for percentage variance explained by the variable of  
35 interest. **(B)** Stacked bar chart of relative abundance (left y-axis) of the top 20 genera  
36 assembled across the cecal 16S rRNA profiles of all four groups. N=6 for all 16S rRNA  
37 sequence analysis. **(C)** Circle plot comparing the significantly differentially abundant  
38 genera between the dietary groups.

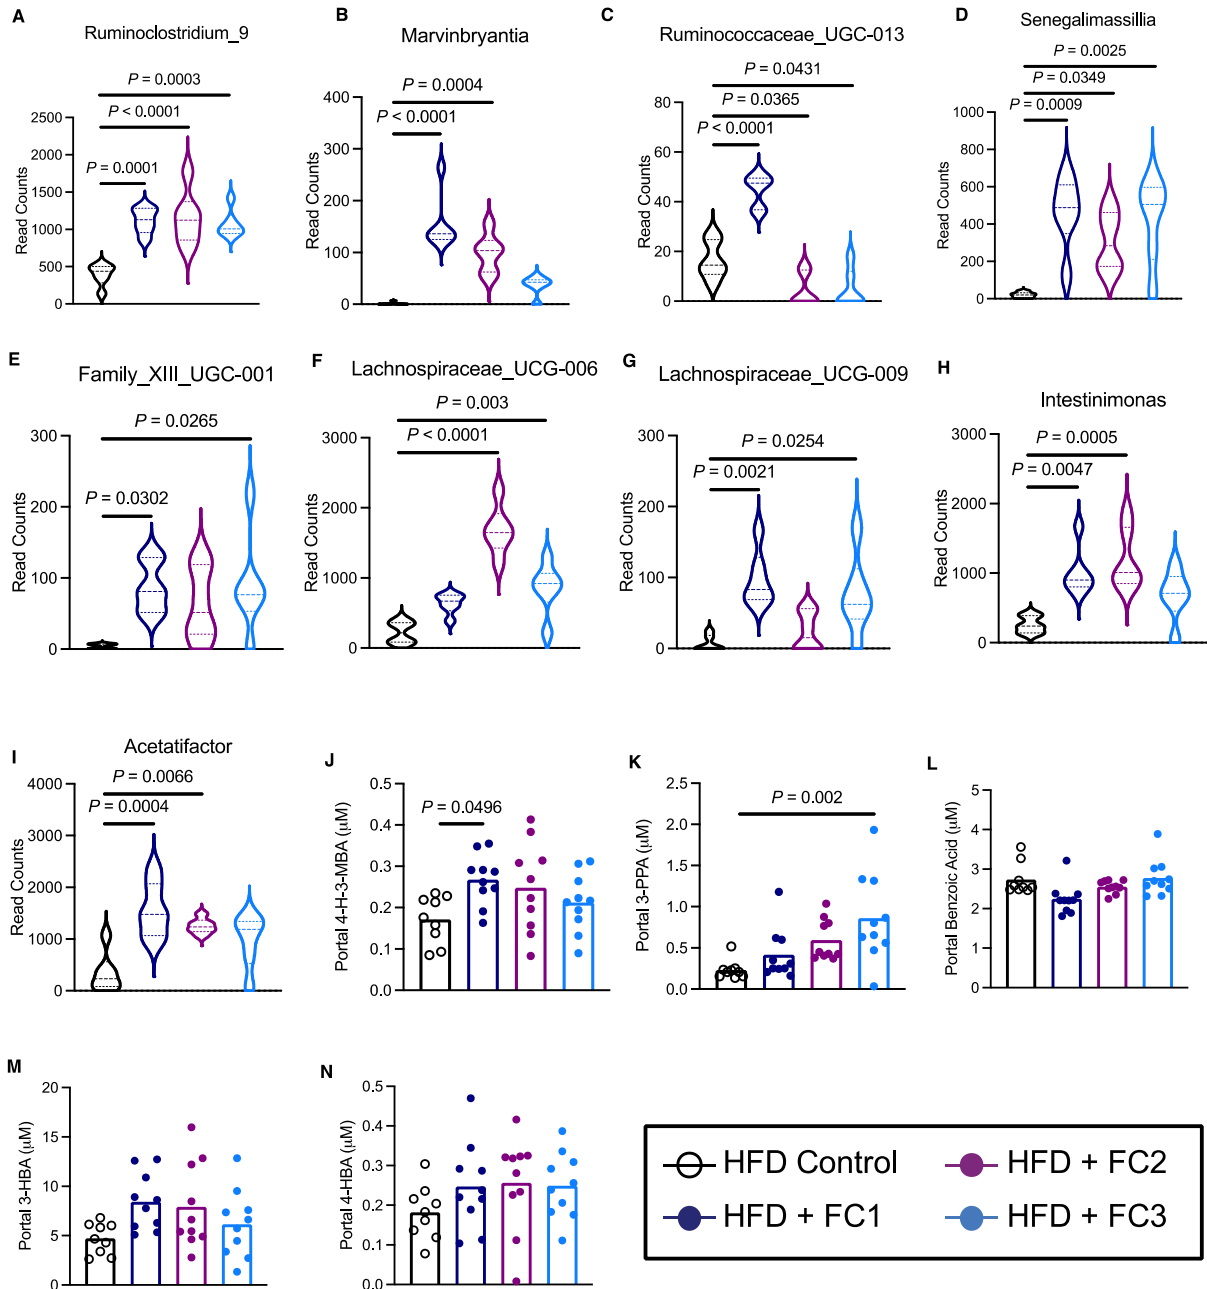

39

40

**Fig. S3. Flavonoid composite feeding impacts cecal microbiome and portal**

41

**plasma flavonoid catabolite levels. (A-I) Violin plots of representative differentially**

42

**abundant bacterial genera identified via 16S rRNA sequencing of cecal contents at the**

43

**time of necropsy, n=6 per group. Ordinary one-way ANOVA with Tukey's multiple**

44 comparisons test used to analyze. (**J-N**) Portal plasma concentration of microbial  
45 flavonol catabolites measured by LC-MS/MS, one-way ANOVA with Dunnett's multiple  
46 comparisons test; n=9-10 per group. Individual points represent individual mice, and  
47 bars represent group means.

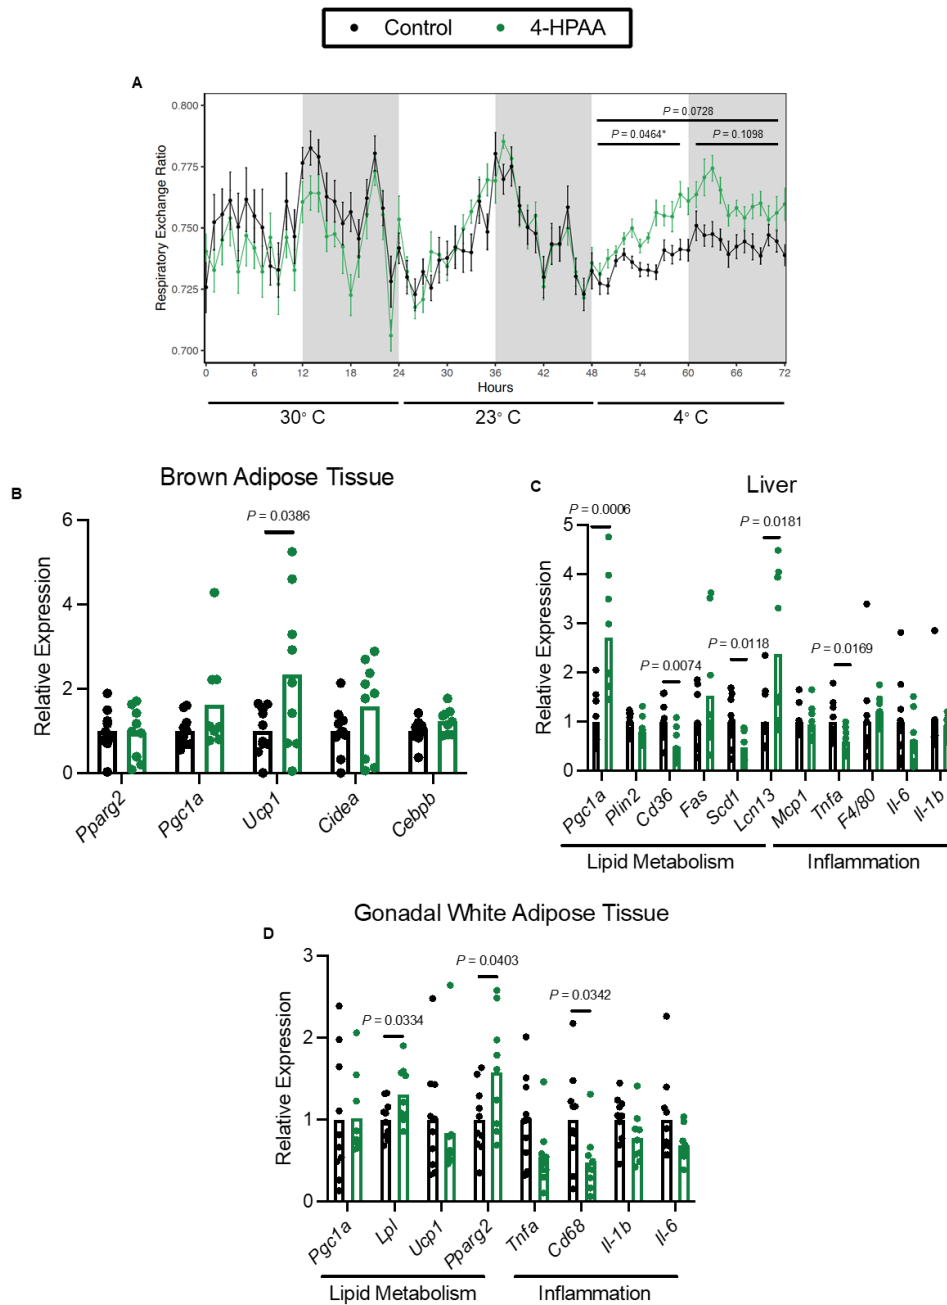

48

49

**Fig. S4. 4-HPAA treated mice demonstrate improved cold tolerance and**

50

**transcriptional changes in metabolically active peripheral tissues. (A)** After twenty-

51

five days of 4-HPAA treatment, global energy substrate utilization was assessed using

52

the Oxymax/CLAMS metabolic cages system, n=6 per group. **(B-D)** RT-qPCR

53

quantification of mRNA transcripts involved in global metabolic programming and



54 inflammation in brown adipose tissue normalized to the average of *Actb* and *Hprt* (**B**),  
55 the liver normalized to *Ppia* (**C**), and gonadal white adipose tissue normalized to *Tbp* or  
56 *Ppia* (**D**), n=9-10 per group. Statistical analysis of Oxymax/CLAMS data was performed  
57 using ANOVA in CalR(47). Statistical analysis of RT-qPCR data was performed using  
58 unpaired two-tailed Student's t-test. Individual points represent individual mice, and bars  
59 represent group means.

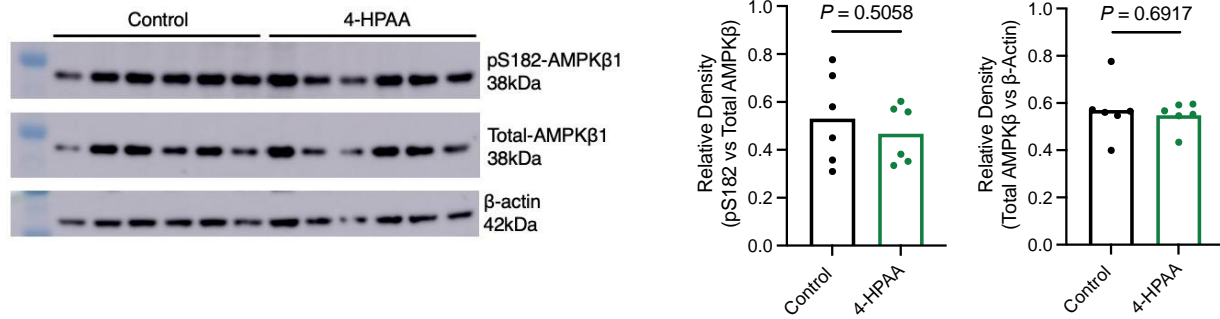

60

61 **Fig. S5. 4-HPAA does not activate AMPKb in mice.** Western blot analysis of  
 62 pAMPKβ1 (S182), total AMPKβ1, and β-actin with densitometric quantification, n=6 per  
 63 group. Statistical analysis was performed using an unpaired two-tailed Student's t test.  
 64 Each dot represents an individual mouse.

65

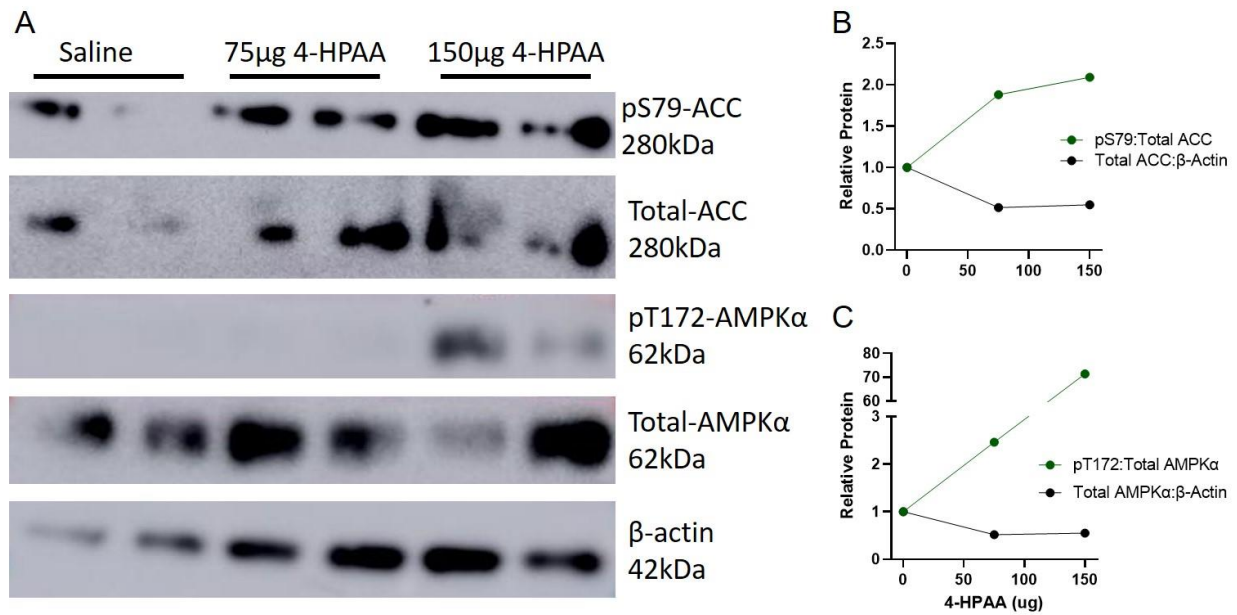

66

67

**Fig. S6. Direct administration of 4-HPAA to the liver via the portal vein activates AMPK pathway and downstream effectors to reduce de novo hepatic lipogenesis.**

68

69

**(A)** Western blot analysis of pACC (S79), total ACC, pAMPKα (T172), total AMPKα and

70

β-actin. n=2 per group **(B)** Densitometric analysis of pACC (S79) and total ACC from

71

mice injected with either saline control (0 μg), 75, or 150 μg of 4-HPAA. n=2 per group.

72

**(C)** Densitometric analysis of pAMPKα (T172), total AMPKα from mice injected with

73

either saline control (0 μg), 75, or 150 μg of 4-HPAA. n=2 per group.

74

75

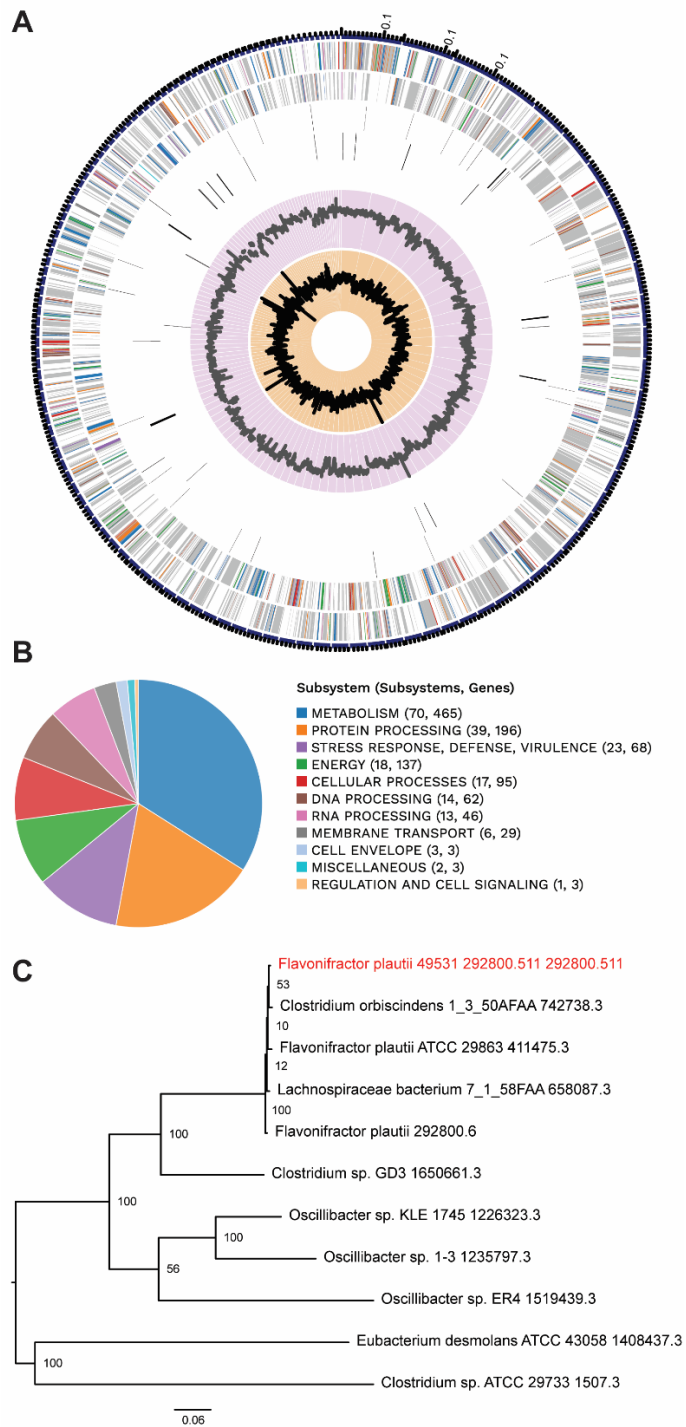

76

77 **Fig. S7. *Flavonifractor plautii* ATCC 49531 genome composition and phylogeny.**

78 (A) A circular graphical display of the distribution of the genome annotations. From

79 outer to inner rings, the contigs, CDS on the forward strand, CDS on the reverse strand,

80 RNA genes, CDS with homology to known antimicrobial resistance genes, CDS with  
81 homology to know virulence factors, GC content and GC skew. The colors of the CDS  
82 on the forward and reverse strand indicate the subsystem that these genes belong to as  
83 summarized in **(B)**. Only the largest 129 contigs are shown. **(C)** Phylogenetic analysis of  
84 the *F. plautii* ATCC 49531 genome.  
85

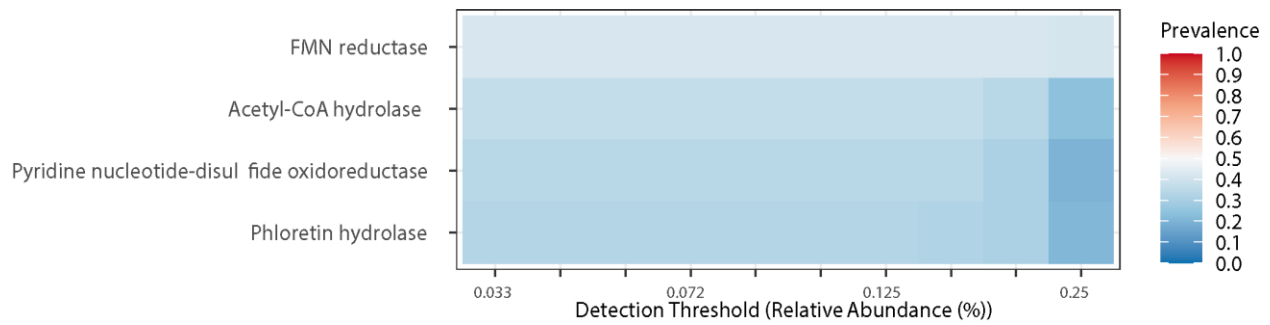

86

87

**Fig. S8. Shotgun metagenomics data demonstrate the consistent prevalence of *F. plautii* in healthy microbiomes.**

88

Relative abundance of *F. plautii* and prevalence of the

89

key marker genes (FMN reductase, Acetyl-CoA hydrolase, Pyridine nucleotide-disulfide

90

oxidoreductase, and Phloretin hydrolase) were measured using Metaphlan2 and whole

91

genome mapping, respectively. Minimum % relative abundance threshold = 0.03349%

92

using the shallowest sequenced sample (11Mbp, and 46,674 reads).

93 **Dataset S1. Metadata for metagenomic sequencing analysis.**

94 Dataset S1.xlsx

95

96 **Dataset S2. Relative abundance analysis of metagenomic sequencing data.**

97 Dataset S2.xlsx

98

99 **Dataset S3. Mapping of Poyet *et al.* 2019 data onto the *F. plautii* genome.**

100 Dataset S3.xlsx

101

102 **Dataset S4. Flavonoid composite information.**

103 Dataset S4.xlsx

104
